# Supplementary material for: Flavones’ and Flavonols’ Antiradical Structure–Activity Relationship—A Quantum Chemical Study
Source: PubMed Central journal article supplement (PMC7346117; doi:10.3390/antiox9060461), 2020-05-27
Supplement: antioxidants-09-00461-s001.pdf [file antioxidants-09-00461-s001.pdf]

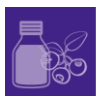

Supplementary Materials

# Figures

Acacetin

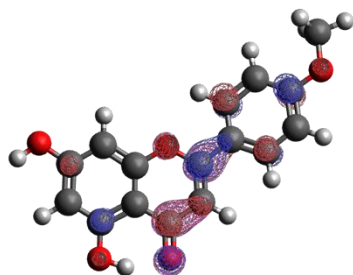

Apigenin

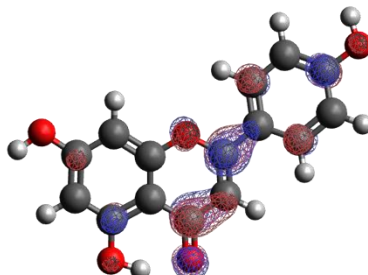

Chrysoeriol

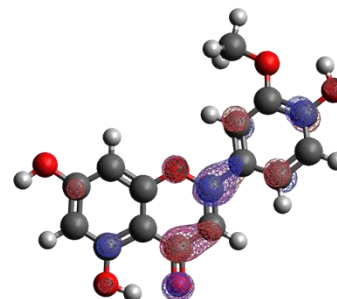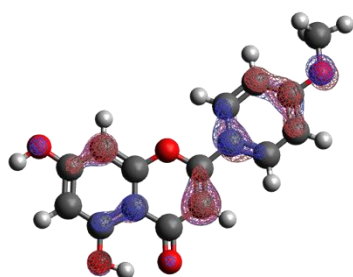

Chrysin

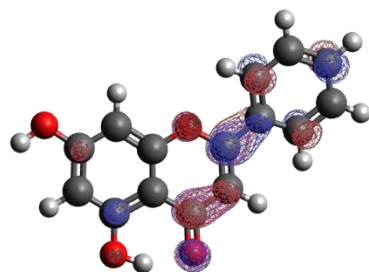

Diosmetin

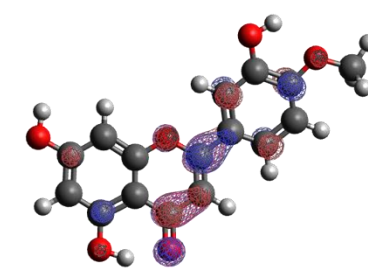

Fisetin

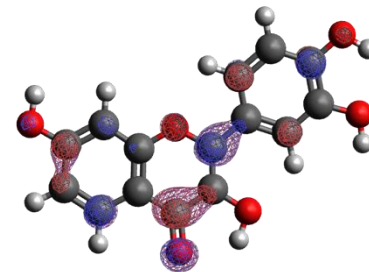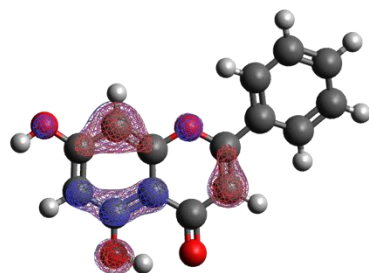

Genkwanin

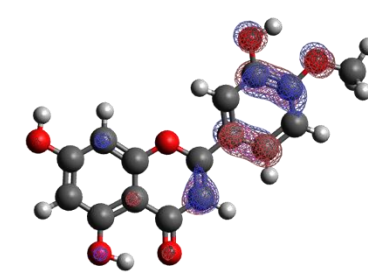

Galangin

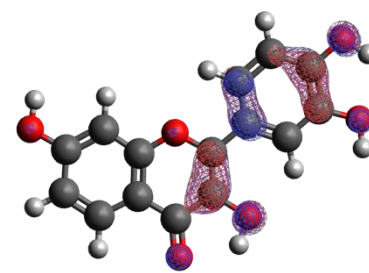

Kaempferol



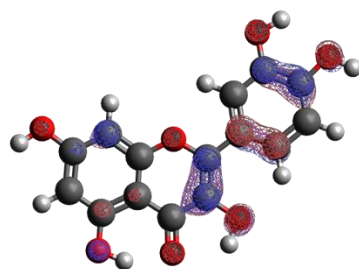

Figure 1. HOMOs (lower) and LUMOs (upper) visualization with isovalue 0.05

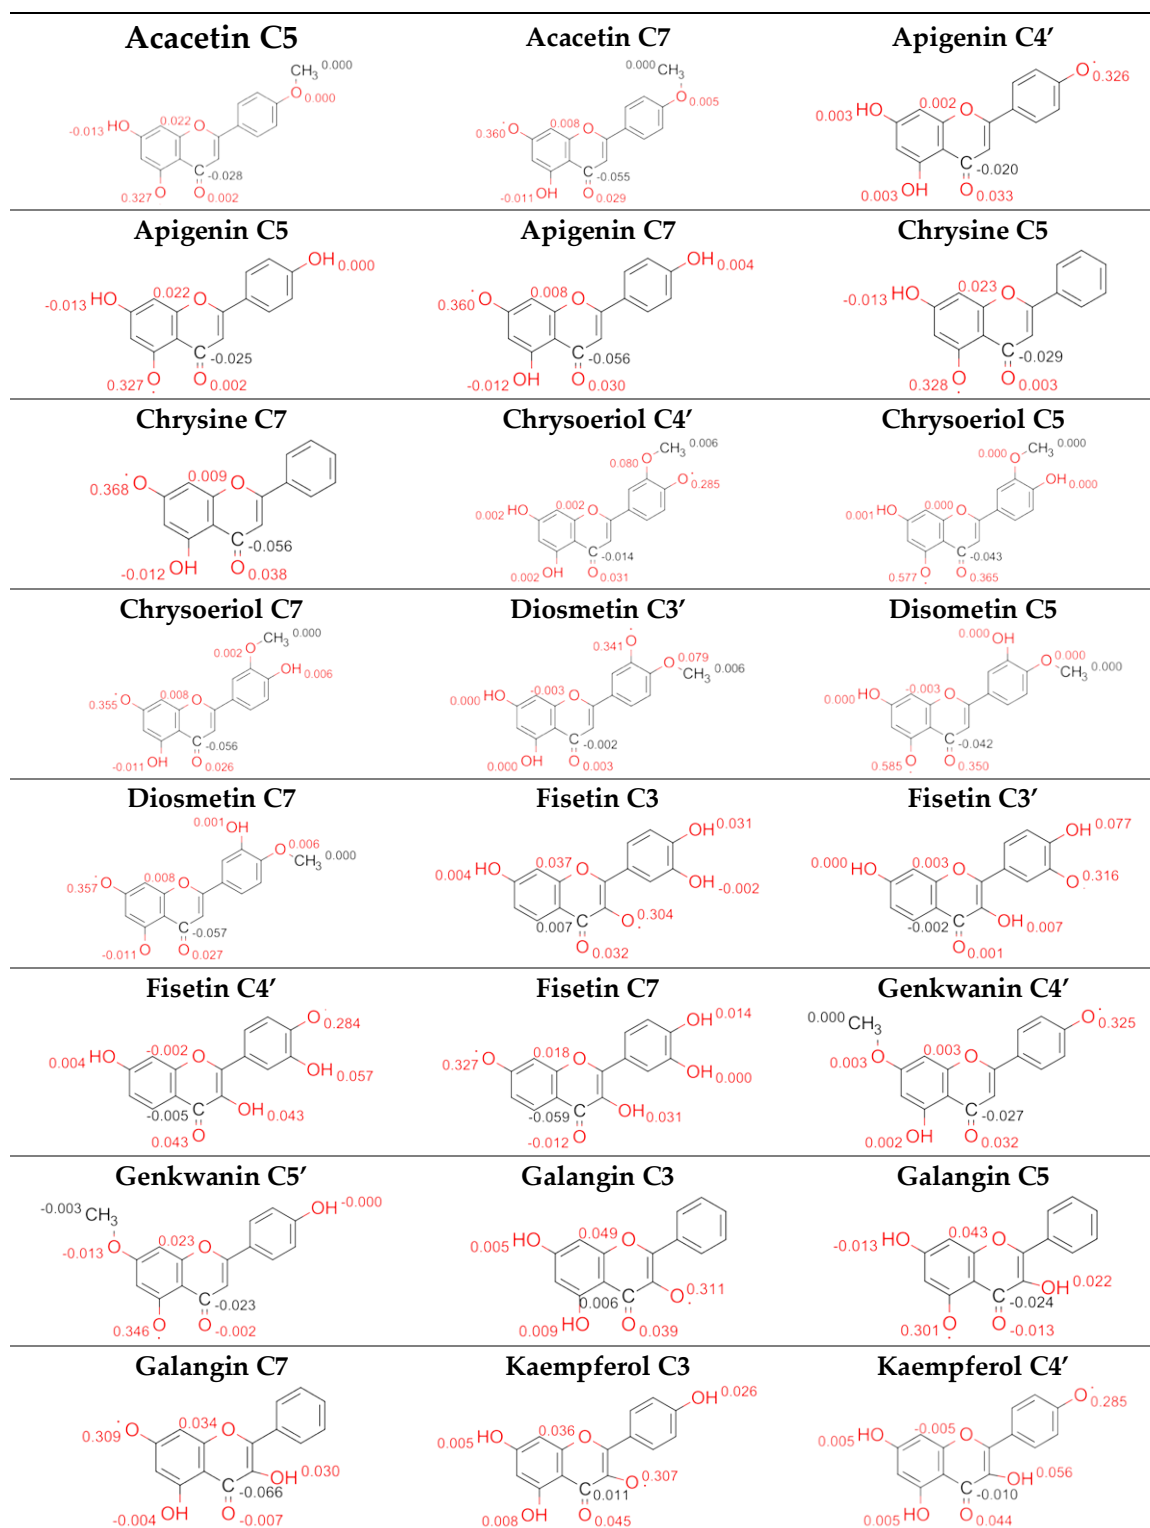

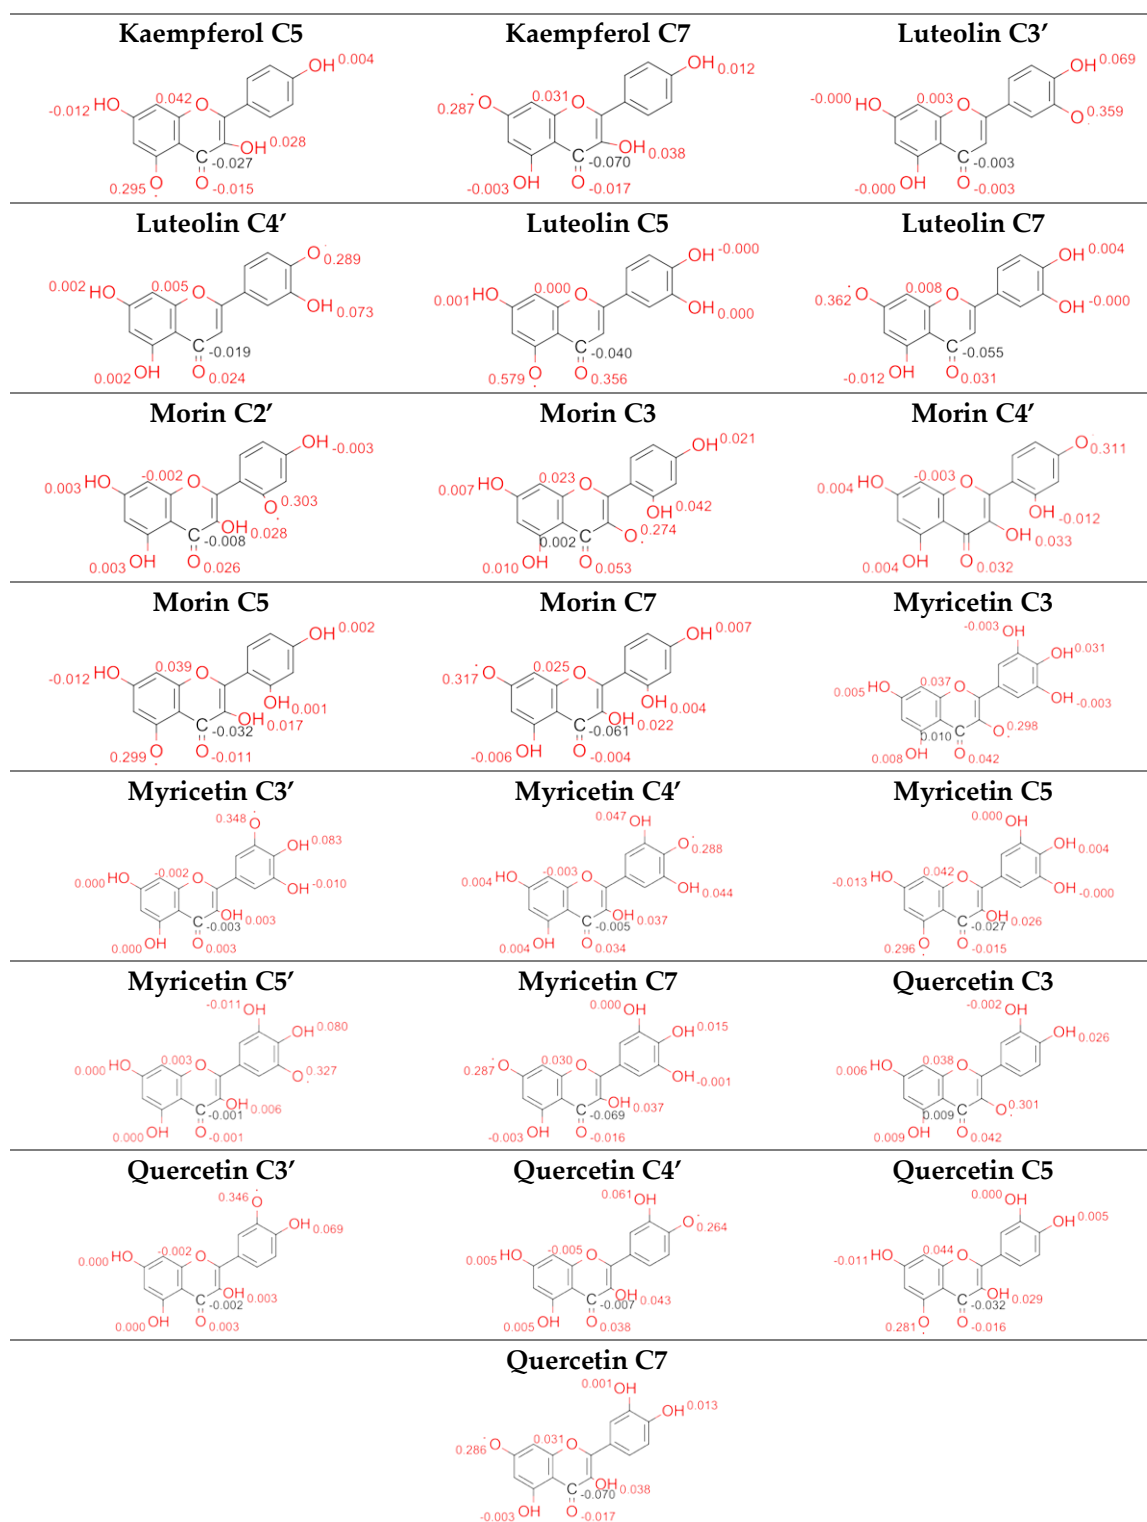

Figure 2. Radicals' Mulliken spin densities with hydrogen summed into heavy atoms

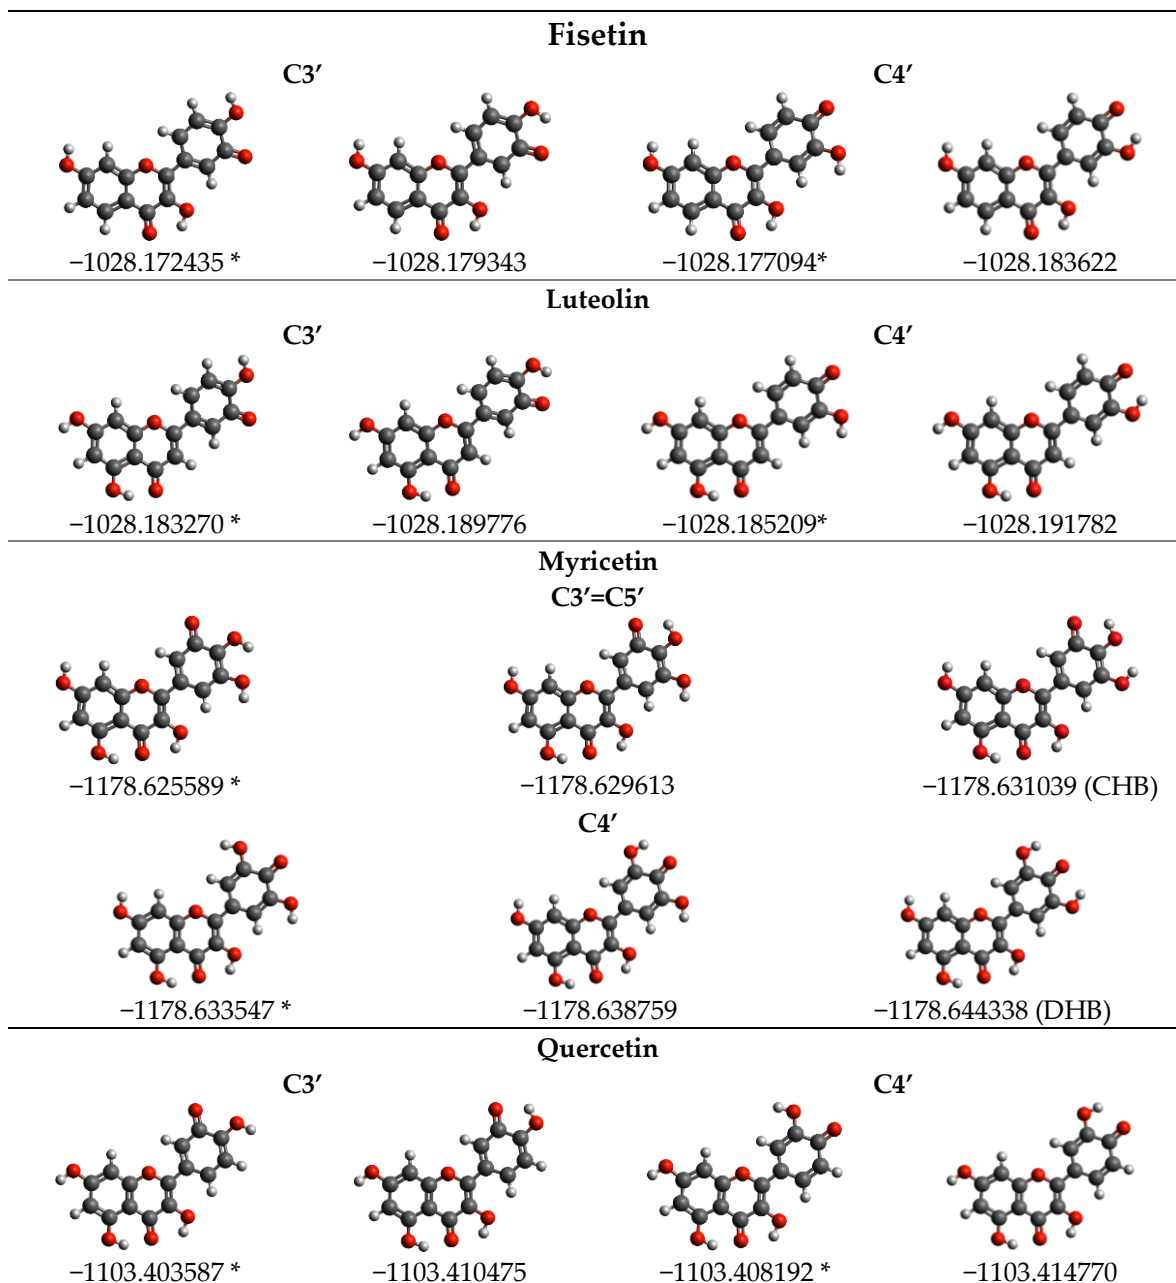

**Figure 3.** Enthalpies of flavonoids' radicals with and without hydrogen bond stabilization (isomer without H-bond is marked \*) [a.u.]

# Tables

**Table 1.** Enthalpies of the flavonoids' lowest energetic isomer at B3LYP/6-31+G(d,p) level of theory [a.u.]

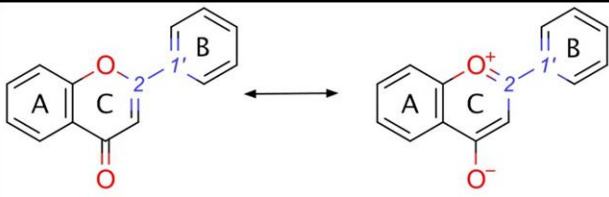

|            | Flavonoid   | Enthalpy     |
|------------|-------------|--------------|
| Flavones   | Acacetin    | -992.861147  |
|            | Apigenin    | -953.589415  |
|            | Chrysin     | -878.363148  |
|            | Chrysoeriol | -1068.084598 |
|            | Diosmetin   | -1068.084312 |
|            | Genkwanin   | -992.861115  |
|            | Luteolin    | -1028.811831 |
|            | Flavonols   | Fisetin      |
| Galangin   |             | -953.582425  |
| Kaempferol |             | -1028.808400 |
| Morin      |             | -1104.033327 |
| Myricetin  |             | -1179.253341 |
| Quercetin  |             | -1104.030864 |

**Table 2.** Enthalpies of unrelaxed and relaxed radicals of investigated compounds [a.u.]

| Flavonoids  |     | Unrelaxed radical | Relaxed radical |
|-------------|-----|-------------------|-----------------|
| Acacetin    | C5  | -992,199222       | -992,213026     |
|             | C7  | -992,216822       | -992,224983     |
| Apigenin    | C4' | -952,947947       | -952,958621     |
|             | C5  | -952,930000       | -952,941269     |
| Chrysin     | C7  | -952,944139       | -952,952039     |
|             | C5  | -877,701313       | -877,715043     |
| Chrysoeriol | C7  | -877,716141       | -877,725026     |
|             | C4' | -1067,446832      | -1067,459122    |
| Diosmetin   | C5  | -1067,415336      | -1067,419226    |
|             | C7  | -1067,439373      | -1067,447632    |
| Genkwanin   | C3' | -1067,445198      | -1067,456637    |
|             | C5  | -1067,414907      | -1067,418746    |
| Luteolin    | C7  | -1067,438585      | -1067,447177    |
|             | C4' | -992,220493       | -992,230596     |
| Fisetin     | C5  | -992,199106       | -992,212595     |
|             | C3' | -1028,172077      | -1028,183270    |
| Galangin    | C4' | -1028,178156      | -1028,191782    |
|             | C5  | -1028,143630      | -1028,146283    |
| Morin       | C7  | -1028,166412      | -1028,174353    |
|             | C3' | -1028,167323      | -1028,179343    |
| Myricetin   | C4' | -1028,164704      | -1028,177094    |
|             | C3  | -1028,162134      | -1028,176690    |
| Quercetin   | C7  | -1028,156325      | -1028,165763    |
|             | C3  | -952,944720       | -952,958463     |

|            |     |              |              |
|------------|-----|--------------|--------------|
|            | C5  | -952,926275  | -952,939686  |
|            | C7  | -952,937061  | -952,946355  |
| Kaempferol | C4' | -1028,171031 | -1028,182027 |
|            | C3  | -1028,173008 | -1028,186897 |
|            | C5  | -1028,152508 | -1028,166096 |
|            | C7  | -1028,165319 | -1028,174020 |
| Morin      | C2' | -1103,385259 | -1103,398629 |
|            | C4' | -1103,392680 | -1103,402521 |
|            | C3  | -1103,399249 | -1103,419264 |
|            | C5  | -1103,376267 | -1103,390761 |
| Myricetin  | C7  | -1103,388420 | -1103,396868 |
|            | C3' | -1178,614708 | -1178,625589 |
|            | C4' | -1178,625608 | -1178,638759 |
|            | C5' | -1178,619670 | -1178,631215 |
| Quercetin  | C3  | -1178,616992 | -1178,631960 |
|            | C5  | -1178,597496 | -1178,611019 |
|            | C7  | -1178,609123 | -1178,618703 |
|            | C3' | -1103,392412 | -1103,403587 |
| Quercetin  | C4' | -1103,401993 | -1103,414770 |
|            | C3  | -1103,395481 | -1103,409514 |
|            | C5  | -1103,375549 | -1103,389360 |
|            | C7  | -1103,387556 | -1103,396441 |

**Table 3.** Radicals thermochemical values [a.u.]

| Flavonoids | Radical | $\epsilon_0 + H_{\text{corr}}$ | $\epsilon_0 + G_{\text{corr}}$ |
|------------|---------|--------------------------------|--------------------------------|
| Luteolin   | C3'     | -1028.190                      | -1028.252                      |
|            | TS      | -1028.179                      | -1028.240                      |
|            | C4'     | -1028.192                      | -1028.255                      |
| Fisetin    | C3'     | -1028.179                      | -1028.243                      |
|            | TS      | -1028.170                      | -1028.232                      |
|            | C4'     | -1028.184                      | -1028.247                      |
| Myricetin  | C3'=C5' | -1178.631                      | -1178.699                      |
|            | TS      | -1178.623                      | -1178.691                      |
|            | C4'     | -1178.643                      | -1178.711                      |
| Quercetin  | C3'     | -1103.410                      | -1103.477                      |
|            | TS      | -1103.401                      | -1103.466                      |
|            | C4'     | -1103.415                      | -1103.480                      |

**Table 4.** Diradicals thermochemical values [a.u.]<sup>ii</sup>

| Flavonoids |         | $\epsilon_0 + H_{\text{corr}}^i$ | $\epsilon_0 + G_{\text{corr}}$ |
|------------|---------|----------------------------------|--------------------------------|
| Luteolin   |         | -1027.514                        | -1027.574                      |
|            |         | <u>-1027.523</u>                 | <u>-1027.578 (r)</u>           |
| Fisetin    |         | -1027.522                        | -1027.583                      |
|            |         | <u>-1027.545</u>                 | <u>-1027.570 (r)</u>           |
| Myricetin  | C3'-C4' | -1177.982                        | -1178.046                      |
|            |         | <u>-1178.001</u>                 | <u>-1178.024 (r)</u>           |
|            | C4'-C5' | -1177.993                        | -1178.057                      |
|            |         | <u>-1178.006</u>                 | <u>-1178.028 (r)</u>           |
| Quercetin  |         | -1102.753                        | -1102.815                      |
|            |         | <u>-1102.776</u>                 | <u>-1102.801 (r)</u>           |

<sup>i</sup> (*r*) marks for the relaxed forms of o-hydroquinone.

<sup>ii</sup> Underlined numbers stand for o-hydroquinone unrelaxed form.

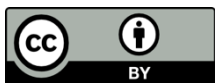

© 2020 by the authors. Submitted for possible open access publication under the terms and conditions of the Creative Commons Attribution (CC BY) license (<http://creativecommons.org/licenses/by/4.0/>).
